# Supplementary material
Source: PubMed Central journal article supplement (PMC2682911)
Supplement: M807598200_1.pdf [file M807598200_1.pdf]

**Irie et al., Supplemental Table**

Table 1. primers for RT-PCR

| Gene     | Primer sequence                                                      | Product size (bp) |
|----------|----------------------------------------------------------------------|-------------------|
| ephrinA1 | F 5'-TGACCGAAGGAAAAGCTTGAGAC-3'<br>R 5'-GCCCGTTAAGCTAAACTCCACA-3'    | 265               |
| ephrinA3 | F 5'-TTTGTCTTCTGTGAAGACAGGA-3'<br>R 5'-AGAGCAGAGTATGAAAGTCACA-3'     | 190               |
| ephrinA4 | F 5'-TTCTGTGAGCCAAGCACACCTTC-3'<br>R 5'-TTTCATCCTGTCTGCCTGGTTTGG-3'  | 120               |
| ephrinA5 | F 5'-TCTGCAATCCCAGACAACGGAA-3'<br>R 5'-ATCGCCAGGAGGAACAGTAGGA-3'     | 251<br>170        |
| EphA1    | F 5'-TCCATACGCATGAAGCGCTAC-3'<br>R 5'-GGCAACGTTATTCCCATCTGC-3'       | 113               |
| EphA2    | F 5'-GCAAGGCAGAAGGTCATTGGA-3'<br>R 5'-TCTCAGTGTAGCCCGCTTTCA-3'       | 124               |
| EphA3    | F 5'-ACCCAAGTTCGAGCAGATCGT-3'<br>R 5'-CCAGAAGAAGGTTTGATGGCC-3'       | 107               |
| EphA4    | F 5'-TCTTTGGAATTTGCGACGCTGTCA-3'<br>R 5'-GGAAACTGGGCTAGATTTCGAACG-3' | 607               |
| EphA5    | F 5'-ATGATCGGCTTCCTCCTCAGT-3'<br>R 5'-CCACACCGCCATATTAGGCTT-3'       | 101               |
| EphA6    | F 5'-AAACTGATCCGCAACCCCA-3'<br>R 5'-AACCCGCTGCCATGAAGTTA-3'          | 166               |
| EphA7    | F 5'-TGTCCATCAATTCGCCAAGG-3'<br>R 5'-CCGGAAGTTTCAAACGACCAC-3'        | 107               |
| EphA8    | F 5'-CGTCTGGTGTGCAAAGTGTCA-3'<br>R 5'-AACGTGCGGAAAGCAATGG-3'         | 134               |
| GAPDH    | F 5'-AGTATGATGACATCAAGAAGG-3'<br>R 5'-ATGGTATTCAAGAGAGTAGGG-3'       | 406               |
